# Supplementary material for: Lanthanum breaks the balance between osteogenesis and adipogenesis of mesenchymal stem cells through phosphorylation of Smad1/5/8
Source: Royal Society of Chemistry journal article supplement (doi:10.1039/c5ra02311d), 2015-01-01
Supplement: c5ra02311d1.pdf [file c5ra02311d1.pdf]

## Supporting Information

# Lanthanum Breaks the Balance between Osteogenesis and Adipogenesis of Mesenchymal Stem Cells through Phosphorylation of Smad1/5/8

Dandan Liu,<sup>ab</sup> Kun Ge,<sup>ac</sup> Jing Sun,<sup>c</sup> Shizhu Chen,<sup>ab</sup> Guang Jia<sup>ab</sup> and Jinchao Zhang \*

<sup>ab</sup>

<sup>a</sup> College of Chemistry and Environmental Science, Chemical Biology Key Laboratory of Hebei Province, Hebei University, Baoding 071002, PR China

<sup>b</sup> Key Laboratory of Medicinal Chemistry and Molecular Diagnosis of the Ministry of Education, Hebei University, Baoding 071002, PR China

<sup>c</sup> Affiliated Hospital of Hebei University, Baoding 071000, PR China

**Table S1. The positions of 84 genes in supper array.**

| Gene     | 1      | 2     | 3        | 4      | 5     | 6      | 7       | 8     | 9      | 10     | 11    | 12     |
|----------|--------|-------|----------|--------|-------|--------|---------|-------|--------|--------|-------|--------|
| <b>A</b> | Abcb1a | Alcam | Anpep    | Anxa5  | Bdnf  | Bglap1 | Bmp2    | Bmp4  | Bmp6   | Bmp7   | Casp3 | Cd44   |
| <b>B</b> | Col1a1 | Csf2  | Csf3     | Ctnnb1 | Egf   | Eng    | Erb2    | Fgf10 | Fgf2   | Fut1   | Fut4  | Fzd9   |
| <b>C</b> | Gdf15  | Gdf5  | Gdf6     | Gdf7   | Gtf3a | Hat1   | Hdac1   | Hgf   | Hnf1a  | Icam1  | Ifng  | Igf1   |
| <b>D</b> | Il10   | Il1b  | Il6      | Ins2   | Itga6 | Itgav  | Itgax   | Itgb1 | Jag1   | Kdr    | Kitl  | Lif    |
| <b>E</b> | Mcam   | Mitf  | Mmp2     | Nes    | Ngfr  | Notch1 | Nt5e    | Nudt6 | Kat2b  | Pdgfrb | Pigs  | Pou5f1 |
| <b>F</b> | Pparg  | Prom1 | Ptk2     | Ptprc  | Rhoa  | Runx2  | Slc17a5 | Smad4 | Smurf1 | Smurf2 | Sox2  | Sox9   |
| <b>G</b> | Tbx5   | Tert  | Tgfb1    | Tgfb3  | Thy1  | Tnf    | Vcam1   | Vegfa | Vim    | Vwf    | Wnt3a | Zfp42  |
| <b>H</b> | Gusb   | Hprt1 | Hsp90ab1 | Gapdh  | Actb  | MGDC   | RTC     | RTC   | RTC    | PPC    | PPC   | PPC    |

**Table S2. Genes involved in TGF $\beta$ /BMP signaling pathway are up-regulated in osteogenic differentiation of MSCs upon their interactions with 0.0001 $\mu$ M La.**

| Functional                    | GeneBank  | Gene Symbol                        | Description                                             | Fold Change |
|-------------------------------|-----------|------------------------------------|---------------------------------------------------------|-------------|
| <b>Osteogenesis Markers</b>   | NM_007553 | Bmp2                               | Bone morphogenetic protein 2                            | 10.4        |
|                               | NM_007556 | Bmp6                               | Bone morphogenetic protein 6                            | 13.0        |
|                               | NM_008002 | Fgf10                              | Fibroblast growth factor 10                             | 1.4         |
|                               | NM_008228 | Hdac1                              | Histone deacetylase 1                                   | 25.3        |
|                               | NM_009327 | Hnf1a                              | HNF1 homeobox A                                         | 0.2         |
|                               | NP_002244 | Kdr                                | Kinase insert domain receptor                           | 0.6         |
|                               | NM_007982 | Ptk2                               | PTK2 protein tyrosine kinase 2                          | 1.8         |
|                               | NM_009820 | Runx2                              | Runt related transcription factor 2                     | 3.3         |
|                               | NM_029438 | Smurf1                             | SMAD specific E3 ubiquitin protein ligase 1             | 0.6         |
|                               | NM_025481 | Smurf2                             | SMAD specific E3 ubiquitin protein ligase 2             | 0.4         |
| NM_011537                     | Tbx5      | T-box 5                            | 2.1                                                     |             |
| <b>Adipogenesis Markers</b>   | NM_011146 | Pparg                              | Peroxisome proliferator activated receptor gamma        | 0.1         |
|                               | NM_016802 | Rhoa                               | Ras homolog gene family, member A                       | 0.1         |
| <b>Chondrogenesis Markers</b> | NM_011076 | Abcb1a                             | ATP-binding cassette, sub-family B (MDR/TAP), member 1A | 0.5         |
|                               | NM_007553 | Bmp2                               | Bone morphogenetic protein 2                            | 10.4        |
|                               | NM_007554 | Bmp4                               | Bone morphogenetic protein 4                            | 8.1         |
|                               | NM_007556 | Bmp6                               | Bone morphogenetic protein 6                            | 13.0        |
|                               | NM_008109 | Gdf5                               | Growth differentiation factor 5                         | 0.2         |
|                               | NM_013526 | Gdf6                               | Growth differentiation factor 6                         | 0.3         |
|                               | NM_013527 | Gdf7                               | Growth differentiation factor 7                         | 0.0         |
|                               | NM_026115 | Hat1                               | Histone aminotransferase 1                              | 0.1         |
|                               | NM_021334 | Itgax                              | Integrin alpha X                                        | 0.1         |
|                               | NM_011448 | Sox9                               | SRY-box containing gene 9                               | 6.4         |
| NM_011577                     | Tgfb1     | Transforming growth factor, beta 1 | 0.8                                                     |             |
| <b>Myogenesis Markers</b>     | NM_013822 | Jag1                               | Jagged 1                                                | 0.1         |
|                               | NM_008714 | Notch1                             | Notch gene homolog 1 (Drosophila)                       | 0.5         |

|                             |                  |        |                                                                                                                |      |
|-----------------------------|------------------|--------|----------------------------------------------------------------------------------------------------------------|------|
| <b>Tenogenesis Markers</b>  | NM_007553        | Bmp2   | Bone morphogenetic protein 2                                                                                   | 10.4 |
|                             | NM_011819        | Gdf15  | Growth differentiation factor 15                                                                               | 0.9  |
|                             | NM_008540        | Smad4  | MAD homolog 4 (Drosophila)                                                                                     | 13.1 |
|                             | NM_011577        | Tgfb1  | Transforming growth factor, beta 1                                                                             | 0.8  |
| <b>Stemness Markers</b>     | NM_008006        | Fgf2   | Fibroblast growth factor 2                                                                                     | 1.3  |
|                             | NM_008387        | Ins2   | Insulin II                                                                                                     | 0.1  |
|                             | NM_008501        | Lif    | Leukemia inhibitory factor                                                                                     | 0.2  |
|                             | NM_013633        | Pou5f1 | POU domain, class 5, transcription factor 1                                                                    | 0.4  |
|                             | NM_011443        | Sox2   | SRY-box containing gene 2                                                                                      | 0.0  |
|                             | NM_009354        | Tert   | Telomerase reverse transcriptase                                                                               | 3.8  |
|                             | NM_009522        | Wnt3a  | Wingless-related MMTV integration site 3A                                                                      | 0.0  |
|                             | NM_009556        | Zfp42  | Zinc finger protein 42                                                                                         | 3.8  |
| <b>MSC-Specific Markers</b> | NM_009655        | Alcam  | Activated leukocyte cell adhesion molecule                                                                     | 0.4  |
|                             | NM_008486        | Anpep  | Alanyl (membrane) aminopeptidase                                                                               | 0.8  |
|                             | NM_009810        | Casp3  | Caspase 3                                                                                                      | 6.2  |
|                             | NM_009851        | Cd44   | CD44 antigen                                                                                                   | 0.8  |
|                             | NM_007932        | Eng    | Endoglin                                                                                                       | 1.6  |
|                             | NM_0010038<br>17 | ErbB2  | V-erb-b2 erythroblastic leukemia viral oncogene homolog 2, neuro/glioblastoma derived oncogene homolog (avian) | 0.9  |
|                             | NM_010242        | Fut4   | Fucosyltransferase 4                                                                                           | 0.0  |
|                             | XM_284144        | Fzd9   | Frizzled homolog 9 (Drosophila)                                                                                | 3.1  |
|                             | NM_008397        | Itga6  | Integrin alpha 6                                                                                               | 0.6  |
|                             | NM_008402        | Itgav  | Integrin alpha V                                                                                               | 0.7  |
|                             | NM_023061        | Mcam   | Melanoma cell adhesion molecule                                                                                | 34.4 |
|                             | NM_033217        | Ngfr   | Nerve growth factor receptor (TNFR superfamily, member 16)                                                     | 0.3  |
|                             | NM_011851        | Nt5e   | 5' nucleotidase, ecto                                                                                          | 0.5  |
|                             | NM_008809        | Pdgfrb | Platelet derived growth factor receptor, beta polypeptide                                                      | 0.9  |
|                             | NM_008935        | Prom1  | Prominin 1                                                                                                     | 3.9  |
|                             | NM_009382        | Thy1   | Thymus cell antigen 1, theta                                                                                   | 1.7  |
|                             | NM_011693        | Vcam1  | Vascular cell adhesion molecule 1                                                                              | 0.2  |
|                             | NM_009673        | Anxa5  | Annexin A5                                                                                                     | 0.4  |
|                             | NM_007540        | Bdnf   | Brain derived neurotrophic factor                                                                              | 7.8  |
|                             | NM_007541        | Bglap1 | Bone gamma carboxyglutamate protein 1                                                                          | 0.7  |
|                             | NM_007557        | Bmp7   | Bone morphogenetic protein 7                                                                                   | 3.8  |
|                             | NM_007742        | Col1a1 | Collagen, type I, alpha 1                                                                                      | 2.3  |
|                             | NM_009969        | Csf2   | Colony stimulating factor 2 (granulocyte-macrophage)                                                           | 0.0  |
|                             | NM_009971        | Csf3   | Colony stimulating factor 3 (granulocyte)                                                                      | 0.0  |
|                             | NM_007614        | Ctnnb1 | Catenin (cadherin associated protein), beta 1                                                                  | 0.8  |
|                             | NM_010113        | Egf    | Epidermal growth factor                                                                                        | 0.6  |
|                             | NM_008051        | Fut1   | Fucosyltransferase 1                                                                                           | 0.1  |
|                             | NM_025652        | Gtf3a  | General transcription factor III A                                                                             | 1.5  |
|                             | NM_010427        | Hgf    | Hepatocyte growth factor                                                                                       | 5.2  |
|                             | NM_010493        | Icam1  | Intercellular adhesion molecule 1                                                                              | 4.9  |

|                                |           |        |                                                             |     |
|--------------------------------|-----------|--------|-------------------------------------------------------------|-----|
| <b>MSCAssociated<br/>Genes</b> | NM_008337 | lfng   | Interferon gamma                                            | 3.8 |
|                                | NM_010512 | Igf1   | Insulin-like growth factor 1                                | 1.2 |
|                                | NM_010548 | IL10   | Interleukin 10                                              | 0.1 |
|                                | NM_008361 | IL1b   | Interleukin 1 beta                                          | 9.6 |
|                                | NM_031168 | IL6    | Interleukin 6                                               | 0.8 |
|                                | NM_010578 | Itgb1  | Integrin beta 1 (fibronectin receptor beta)                 | 0.1 |
|                                | NM_008601 | Mitf   | Microphthalmia-associated transcription factor              | 0.2 |
|                                | Mmp2      | Mmp2   | Matrix metalloproteinase 2                                  | 0.1 |
|                                | NM_016701 | Nes    | Nestin                                                      | 0.3 |
|                                | NM_153561 | Nudt6  | Nudix (nucleoside diphosphate linked moiety X)-type motif 6 | 0.4 |
|                                | NM_201406 | Pigs   | Phosphatidylinositol glycan anchor biosynthesis, class S    | 4.6 |
|                                | NM_011210 | Ptprc  | Protein tyrosine phosphatase, receptor type, C              | 7.5 |
|                                | NM_172773 | Slc7a5 | Solute carrier family 7 (anion/sugar transporter), member 5 | 0.8 |
|                                | NM_009368 | Tgfb3  | Transforming growth factor, beta 3                          | 2.0 |
|                                | NM_013693 | Tnf    | Tumor necrosis factor                                       | 1.7 |
|                                | NM_009505 | Vegfa  | Vascular endothelial growth factor A                        | 0.2 |
|                                | NM_011701 | Vim    | Vimentin                                                    | 1.2 |
|                                | NM_011708 | Vwf    | Von Willebrand factor homolog                               | 0.2 |

**Table S3.** Genes involved in TGF $\beta$ /BMP signaling pathway are down-regulated in adipogenic differentiation of MSCs upon their interactions with 0.0001  $\mu$ M La.

| Functional                      | GeneBank  | Gene Symbol | Description                                             | Fold Change |
|---------------------------------|-----------|-------------|---------------------------------------------------------|-------------|
| <b>Osteogenesis<br/>Markers</b> | NM_007553 | Bmp2        | Bone morphogenetic protein 2                            | 1.4         |
|                                 | NM_007556 | Bmp6        | Bone morphogenetic protein 6                            | 0.4         |
|                                 | NM_008002 | Fgf10       | Fibroblast growth factor 10                             | 3.0         |
|                                 | NM_008228 | Hadc1       | Histone deacetylase 1                                   | 0.1         |
|                                 | NM_009327 | Hnf1a       | HNF1 homeobox A                                         | 0.7         |
|                                 | NP_002244 | Kdr         | Kinase insert domain receptor                           | 1.4         |
|                                 | NM_007982 | Ptk2        | PTK2 protein tyrosine kinase 2                          | 0.6         |
|                                 | NM_009820 | Runx2       | Runt related transcription factor 2                     | 0.3         |
|                                 | NM_029438 | Smurf1      | SMAD specific E3 ubiquitin protein ligase 1             | 1.7         |
|                                 | NM_025481 | Smurf2      | SMAD specific E3 ubiquitin protein ligase 2             | 0.4         |
|                                 | NM_011537 | Tbx5        | T-box 5                                                 | 2.3         |
| <b>Adipogenesis<br/>Markers</b> | NM_011146 | Pparg       | Peroxisome proliferator activated receptor gamma        | 1.8         |
|                                 | NM_016802 | Rhoa        | Ras homolog gene family, member A                       | 0.9         |
| <b>Chondrogenesi</b>            | NM_011076 | Abcb1a      | ATP-binding cassette, sub-family B (MDR/TAP), member 1A | 1.6         |
|                                 | NM_007553 | Bmp2        | Bone morphogenetic protein 2                            | 1.4         |
|                                 | NM_007554 | Bmp4        | Bone morphogenetic protein 4                            | 0.1         |
|                                 | NM_007556 | Bmp6        | Bone morphogenetic protein 6                            | 0.4         |
|                                 | NM_008109 | Gdf5        | Growth differentiation factor 5                         | 3.4         |
|                                 | NM_013526 | Gdf6        | Growth differentiation factor 6                         | 0.6         |

|                             |                  |        |                                                                                                                |     |
|-----------------------------|------------------|--------|----------------------------------------------------------------------------------------------------------------|-----|
| <b>s Markers</b>            | NM_013527        | Gdf7   | Growth differentiation factor 7                                                                                | 0.7 |
|                             | NM_026115        | Hat1   | Histone aminotransferase 1                                                                                     | 1.0 |
|                             | NM_021334        | Itgax  | Integrin alpha X                                                                                               | 1.4 |
|                             | NM_011448        | Sox9   | SRY-box containing gene 9                                                                                      | 1.8 |
|                             | NM_011577        | Tgfb1  | Transforming growth factor, beta 1                                                                             | 0.7 |
| <b>Myogenesis Markers</b>   | NM_013822        | Jag1   | Jagged 1                                                                                                       | 0.8 |
|                             | NM_008714        | Notch1 | Notch gene homolog 1 (Drosophila)                                                                              | 0.6 |
| <b>Tenogenesis Markers</b>  | NM_007553        | Bmp2   | Bone morphogenetic protein 2                                                                                   | 1.4 |
|                             | NM_011819        | Gdf15  | Growth differentiation factor 15                                                                               | 1.8 |
|                             | NM_008540        | Smad4  | MAD homolog 4 (Drosophila)                                                                                     | 0.7 |
|                             | NM_011577        | Tgfb1  | Transforming growth factor, beta 1                                                                             | 0.5 |
| <b>Stemness Markers</b>     | NM_008006        | Fgf2   | Fibroblast growth factor 2                                                                                     | 0.4 |
|                             | NM_008387        | Ins2   | Insulin II                                                                                                     | 0.9 |
|                             | NM_008501        | Lif    | Leukemia inhibitory factor                                                                                     | 1.5 |
|                             | NM_013633        | Pou5f1 | POU domain, class 5, transcription factor 1                                                                    | 4.0 |
|                             | NM_011443        | Sox2   | SRY-box containing gene 2                                                                                      | 1.5 |
|                             | NM_009354        | Tert   | Telomerase reverse transcriptase                                                                               | 2.2 |
|                             | NM_009522        | Wnt3a  | Wingless-related MMTV integration site 3A                                                                      | 1.1 |
|                             | NM_009556        | Zfp42  | Zinc finger protein 42                                                                                         | 1.0 |
| <b>MSC-Specific Markers</b> | NM_009655        | Alcam  | Activated leukocyte cell adhesion molecule                                                                     | 1.8 |
|                             | NM_008486        | Anpep  | Alanyl (membrane) aminopeptidase                                                                               | 1.2 |
|                             | NM_009810        | Casp3  | Caspase 3                                                                                                      | 1.2 |
|                             | NM_009851        | Cd44   | CD44 antigen                                                                                                   | 1.2 |
|                             | NM_007932        | Eng    | Endoglin                                                                                                       | 0.4 |
|                             | NM_0010038<br>17 | ErbB2  | V-erb-b2 erythroblastic leukemia viral oncogene homolog 2, neuro/glioblastoma derived oncogene homolog (avian) | 0.7 |
|                             | NM_010242        | Fut4   | Fucosyltransferase 4                                                                                           | 0.6 |
|                             | XM_284144        | Fzd9   | Frizzled homolog 9 (Drosophila)                                                                                | 1.4 |
|                             | NM_008397        | Itga6  | Integrin alpha 6                                                                                               | 0.6 |
|                             | NM_008402        | Itgav  | Integrin alpha V                                                                                               | 0.9 |
|                             | NM_023061        | Mcam   | Melanoma cell adhesion molecule                                                                                | 0.3 |
|                             | NM_033217        | Ngfr   | Nerve growth factor receptor (TNFR superfamily, member 16)                                                     | 2.6 |
|                             | NM_011851        | Nt5e   | 5' nucleotidase, ecto                                                                                          | 0.3 |
|                             | NM_008809        | Pdgfrb | Platelet derived growth factor receptor, beta polypeptide                                                      | 0.8 |
|                             | NM_008935        | Prom1  | Prominin 1                                                                                                     | 0.2 |
|                             | NM_009382        | Thy1   | Thymus cell antigen 1, theta                                                                                   | 0.9 |
|                             | NM_011693        | Vcam1  | Vascular cell adhesion molecule 1                                                                              | 0.4 |
|                             | NM_009673        | Anxa5  | Annexin A5                                                                                                     | 1.5 |
|                             | NM_007540        | Bdnf   | Brain derived neurotrophic factor                                                                              | 1.7 |
|                             | NM_007541        | Bglap1 | Bone gamma carboxyglutamate protein 1                                                                          | 0.0 |
|                             | NM_007557        | Bmp7   | Bone morphogenetic protein 7                                                                                   | 6.1 |
|                             | NM_007742        | Col1a1 | Collagen, type I, alpha 1                                                                                      | 0.1 |
|                             | NM_009969        | Csf2   | Colony stimulating factor 2 (granulocyte-macrophage)                                                           | 0.8 |

|                                |           |        |                                                              |     |
|--------------------------------|-----------|--------|--------------------------------------------------------------|-----|
| <b>MSCAssociated<br/>Genes</b> | NM_009971 | Csf3   | Colony stimulating factor 3 (granulocyte)                    | 0.5 |
|                                | NM_007614 | Ctnnb1 | Catenin (cadherin associated protein), beta 1                | 1.0 |
|                                | NM_010113 | Egf    | Epidermal growth factor                                      | 1.5 |
|                                | NM_008051 | Fut1   | Fucosyltransferase 1                                         | 2.4 |
|                                | NM_025652 | Gtf3a  | General transcription factor III A                           | 0.9 |
|                                | NM_010427 | Hgf    | Hepatocyte growth factor                                     | 1.9 |
|                                | NM_010493 | Icam1  | Intercellular adhesion molecule 1                            | 0.7 |
|                                | NM_008337 | Iifng  | Interferon gamma                                             | 1.3 |
|                                | NM_010512 | Igf1   | Insulin-like growth factor 1                                 | 0.9 |
|                                | NM_010548 | IL10   | Interleukin 10                                               | 0.1 |
|                                | NM_008361 | IL1b   | Interleukin 1 beta                                           | 0.0 |
|                                | NM_031168 | IL6    | Interleukin 6                                                | 0.4 |
|                                | NM_010578 | Itgb1  | Integrin beta 1 (fibronectin receptor beta)                  | 0.5 |
|                                | NM_008601 | Mitf   | Microphthalmia-associated transcription factor               | 0.8 |
|                                | Mmp2      | Mmp2   | Matrix metalloproteinase 2                                   | 1.0 |
|                                | NM_016701 | Nes    | Nestin                                                       | 1.0 |
|                                | NM_153561 | Nudt6  | Nudix (nucleoside diphosphate linked moiety X)-type motif 6  | 0.5 |
|                                | NM_201406 | Pigs   | Phosphatidylinositol glycan anchor biosynthesis, class S     | 0.7 |
|                                | NM_011210 | Ptprc  | Protein tyrosine phosphatase, receptor type, C               | 0.5 |
|                                | NM_172773 | Slc7a5 | Solute carrier family 17 (anion/sugar transporter), member 5 | 1.3 |
|                                | NM_009368 | Tgfb3  | Transforming growth factor, beta 3                           | 0.4 |
|                                | NM_013693 | Tnf    | Tumor necrosis factor                                        | 0.5 |
|                                | NM_009505 | Vegfa  | Vascular endothelial growth factor A                         | 0.5 |
|                                | NM_011701 | Vim    | Vimentin                                                     | 4.0 |
|                                | NM_011708 | Vwf    | Von Willebrand factor homolog                                | 0.2 |
